# Advertising ultra-processed foods around urban and rural schools in Kenya

1 **Authors:** Caroline H. Karugu<sup>1,2\*</sup>, Gershim Asiki<sup>1,3</sup>, Milka Wanjohi<sup>1</sup>, Veronica Ojiambo<sup>1,4</sup>, Richard  
2 Sanya<sup>1</sup>, Amos Laar<sup>5</sup>, Michelle Holdsworth<sup>6</sup>, Stefanie Vandevijvere<sup>7</sup>, Charles Agyemang<sup>2,8</sup>

## 3 **Affiliation**

4 <sup>1</sup>Chronic Diseases Management Unit, African Population Health Research Center, Nairobi, Kenya.

5 <sup>2</sup>Department of Public and Occupational Health, Amsterdam Public Health, University of Amsterdam  
6 Medical Centers, Amsterdam, the Netherlands.

7 <sup>3</sup>Department of Women's and Children's Health, Karolinska Institute, Stockholm, Sweden.

8 <sup>4</sup>Department of Public & Global Health, University of Nairobi, Kenya.

9 <sup>5</sup>School of Public Health, University of Ghana, Accra, Ghana.

10 <sup>6</sup>UMR MoISA (Montpellier Interdisciplinary Centre On Sustainable Agri-Food Systems), (Univ  
11 Montpellier, CIRAD, CIHEAM-IAMM, INRAE, Institut Agro, IRD), Montpellier, France.

12 <sup>7</sup>Sciensano, Service of Lifestyle and Chronic Diseases, Brussels, Belgium.

13 <sup>8</sup>Division of Endocrinology, Diabetes, and Metabolism, Department of Medicine, Johns Hopkins  
14 University School of Medicine, Baltimore, MD, USA.

15

## 16 **\* Correspondence:**

17 Email: ckarugu@aphrc.org.

18

19 **Keywords:** Food marketing, Outdoor advertisements, Healthy foods, Unhealthy` foods, Ultra-  
20 processed foods, Sugar-sweetened beverages, School neighborhoods, Food environments.

21

22

23

24

25

26

27

28

29

## 30 Abstract

31 **Background:** Marketing of ultra-processed foods (UPFs) can influence purchase intentions  
32 and consumption of such foods, especially among children. There is limited evidence on the extent to  
33 which UPFs are marketed around schools in low- and middle-income countries (LMICs), including  
34 Kenya. We assessed the extent, content, and type of advertising of ultra-processed/unhealthy foods  
35 around schools in urban and rural settings in Kenya.

36 **Methods:** This cross-sectional study assessed advertising of food and beverages within a 250m  
37 radius around schools in Kenya between June to July 2021. We conducted the study in three counties  
38 (Nairobi-urban, Mombasa-coastal urban city, and Baringo-rural). Each county was stratified into high  
39 and low socioeconomic status (SES) sub-counties. Within each, we randomly selected schools and  
40 collected detailed information on advertising around the schools. The information gathered included  
41 the location, type of food and beverage product advertised, and the promotional techniques used. We  
42 used the NOVA classification and International Network for Food and Obesity/NCDs Research  
43 Monitoring and Action Support (INFORMAS) methods to categorize the food and beverages  
44 advertised based on processing level and core (healthy)/non-core(unhealthy) groups. We determined  
45 the extent of advertisements using descriptive analysis frequencies, and median (interquartile ranges).  
46 Poisson regression was used to determine the factors associated with UPF advertisements.

47 **Results:** In total, 2300 food and beverage advertisements were mapped around the 500 schools.  
48 There was a higher median number of advertisements in urban areas (median=25, Interquartile range  
49 (IQR)=25,160) compared to rural areas (median=10, IQR= 4, 13). Of these advertisements,  
50 approximately 48.0% were UPFs. The most common promotional strategy used was cartoon and  
51 company-owned characters, while the most frequent premium offer was price discounts. In the  
52 multivariate analysis, there was a significantly higher rate of advertisements of UPFs in Baringo

53 County (prevalence rate ratios (PRR): 1.17, 95% CI: 1.01-1.36) compared to the urban Nairobi County,  
54 and in lower compared to higher SES settings (PRR: 1.10, 95% CI: 1.01-1.20).

55 **Conclusion:** UPFs are frequently advertised around schools with promotional strategies that  
56 may be appealing to children. There is a need to restrict the marketing of unhealthy foods around  
57 schools to children in Kenya.

58

## 59 **Introduction**

60 Overweight and obesity are a growing global challenge largely driven by obesogenic food  
61 environments and the consumption of unhealthy foods, as well as insufficient physical activity (1).  
62 Obesity prevalence is projected to increase over time, particularly in low and middle-income countries  
63 (LMICs) (2). A major challenge in LMICs is the double burden of malnutrition in children.  
64 Overweight and obesity and undernutrition in childhood are all associated with an increased future risk  
65 of non-communicable diseases in adulthood (3).

66 The economic and industrial transition in various settings has impacted the food environments  
67 that children and adults are exposed to substantially. There is an increasing trend in the marketing of  
68 unhealthy foods such as ready-to-eat snacks and sweetened drinks and beverages targeting children  
69 and adolescents (4–6). Children are progressively exposed to unhealthy foods and beverages by  
70 industries targeting settings and platforms such as schools, the traditional media including TV and  
71 radio, and, social media (3,7,8). Several persuasive techniques such as cartoons, company-owned  
72 characters, celebrity brand endorsements, gifts and collectibles, price discounts, and game application  
73 downloads are used to entice children toward the purchase and consumption of unhealthy foods(9,10).  
74 Marketing of unhealthy foods influences dietary habits, attitudes, and preferences toward unhealthy  
75 foods, and increased consumption of the marketed food and beverages (6). In both HICs and LMICs,  
76 there is an increasing trend in advertising unhealthy foods and beverages targeting children (11).

77 Various studies have been conducted in both LMICs and HICs illustrating the extent of marketing  
78 health-harming food products to children and adolescents (12–18). Studies conducted in New Zealand  
79 and Australia representing different socioeconomic deprivation areas showed that the majority of the  
80 advertised food and beverage products were prohibited by the World Health Organization (WHO)  
81 nutrition profile model and were mostly soft drinks and alcoholic drinks(12,13). In the Philippines  
82 and Guatemala, studies assessing outdoor advertisements around school neighborhoods showed a high

83 density of advertisements around schools and a high level of advertisements of unhealthy foods that  
84 target children (19,20). A study conducted in Uganda's capital- Kampala- around school  
85 neighborhoods showed that more than 80% of advertisements were for sugar-sweetened beverages,  
86 especially in urban settings(21). In Ghana, approximately 69% of the food and beverage products  
87 advertised were in the ultra-processed foods (UPFs) category, with the cartoon and company-owned  
88 characters as the main promotional characters used (18). Most of the studies on marketing around  
89 school environments have focused on urban neighborhoods (18,21).

90 In this study, we assessed the extent, content, type, and power of advertising of ultra-  
91 processed/unhealthy foods around schools in both urban and rural settings in Kenya. We further  
92 explored other factors associated with the marketing of UPFs.

93

## 94 **Materials and methods**

### 95 ***Study design***

96 This was a cross-sectional study conducted in Kenya from June 2021 to July 2021, which  
97 assessed the food and beverage marketing around primary and secondary schools. The study adopted  
98 the International Network for Food and Obesity/NCDs Research Monitoring and Action Support  
99 (INFORMAS) methodology, the outdoor food advertisement protocol in particular(22).

### 100 ***Study setting***

101 Three counties (Nairobi, Mombasa, and Baringo) were selected to represent different contexts  
102 including urban and rural, low and high socio-economic status (SES) within urban settings, and a  
103 tourist destination in Kenya (Figure 1). Each county was stratified into low and high SES sub-counties  
104 using poverty-level data from the 2019 Kenya National Bureau of Statistics (KNBS) estimates (23). In

105 Nairobi County Westlands (higher SES), Langata (higher SES), Embakasi (lower SES), Kibra (lower  
106 SES), and Mathare (lower SES) were selected. In Mombasa county, Mvita (Higher SES), and Kisauni  
107 (lower SES) sub-counties were selected. Lastly, in Baringo county, we included Mogotio (higher SES),  
108 and Baringo North (lower SES) sub-counties.

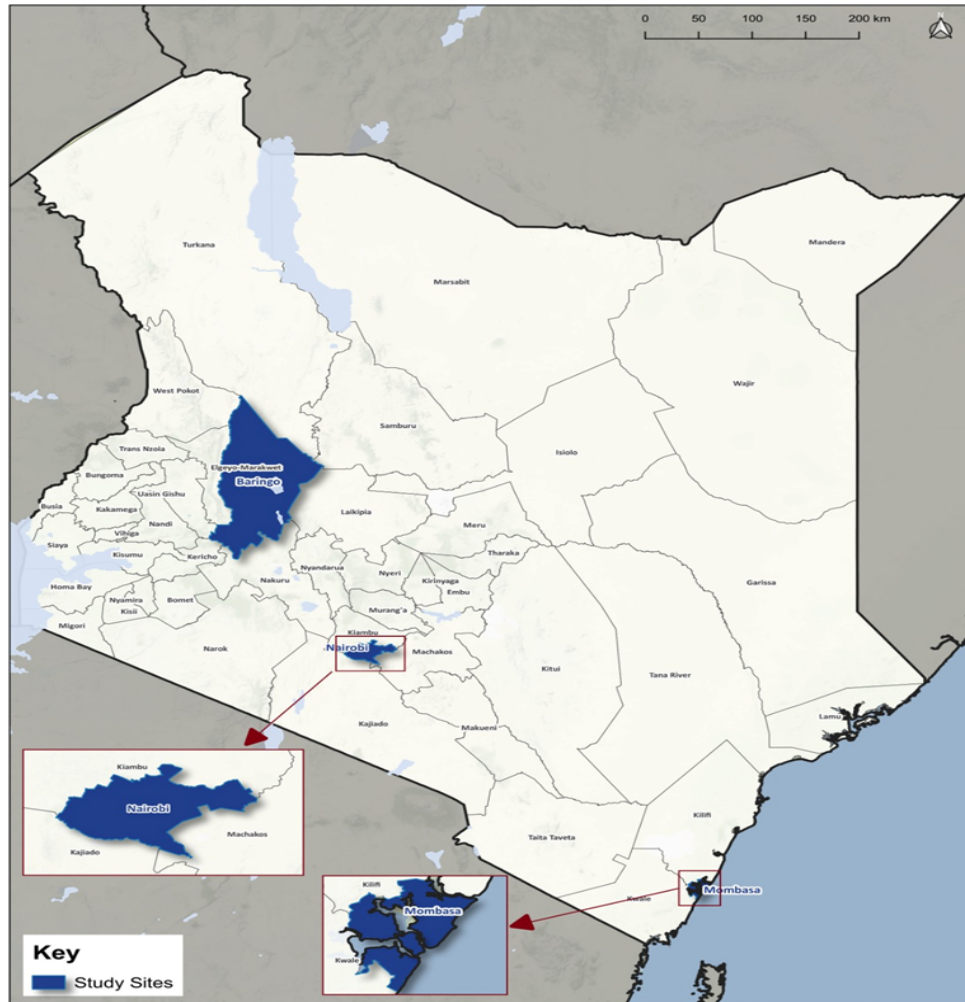

109  
110 **Figure 1: Map of Kenya showing the counties selected for assessing food availability and marketing at**  
111 **modern food retailers in 2021**

112

## 113 **Sample size and sampling.**

114 We employed a multistage stratified sampling technique in this study. First, we estimated a  
115 sample size of 500, considering a prevalence of 23% of unhealthy food advertisements in deprived-  
116 resource settings (24), a power of 80%, and a margin of error of 0.05. We further adjusted this sample  
117 size considering a 10% nonresponse rate in all the settings. The 500 schools were further randomly  
118 allocated proportionately to the number of schools by level (primary or secondary and type (private or  
119 public) in each county and sub-county using the stratified sampling method. The list of schools by  
120 location, level, and type was provided by the Ministry of Education.

## 121 **Data collection procedures**

122 After obtaining ethical approvals from the AMREF-Health Ethics and Scientific Review  
123 Committee in Kenya (approval number: ESRC/P901/2020), and permission from the school heads, the  
124 research team comprising two data collectors per school at a time was deployed to the selected schools.  
125 They were trained to identify the required distance/radius from the main school gates and entrances  
126 and collect data on the advertisements within the defined radius (24), as per the INFORMAS outdoor  
127 advertisements protocol used in previous studies in LMIC settings (18,22).

## 128 **Food marketing assessments/ Study variables**

129 The details of the schools including the school name, school type (private, public, primary  
130 school, secondary school), school setting (urban, rural, peri-urban), school population, and number of  
131 school entrances were recorded. All the advertisements within the pre-determined Euclidean radius  
132 around the schools were recorded. This involved first identifying the location of the food and beverage  
133 advertisement; whether the product was placed in food shops, buildings, on the roadside, bus  
134 shelter/bus stage, or mobile karts. The format of advertisements (billboards, posters/banners, standing

135 signs, painted walls and buildings, digital signs, and store merchandising) n was also recorded. The  
136 size of the advertisements was determined either as small (> A4 but <1.3m X 1.9m), medium (<1.3m  
137 X 1.9m but < 2.0m X 2.5m), or large (2m X 2.5m). Further, we assessed the content of the  
138 advertisement (logos/company pictorials, text, combined logos, and text) and the number of food  
139 products in the individual advertisement (single-food product type, two-food product type, three-food  
140 product type, and >3 food product type). The individual food item advertisement was recorded and the  
141 corresponding promotional characters and premium offers were used. The promotional characters  
142 include cartoon or company-owned characters, famous sports persons, movie titles, or images with  
143 kids. The premium offers included price discounts, limited stock editions, and buy one get one free.

## 144 **Food classification**

145 The food and beverage products advertised around school neighborhoods were categorized  
146 based on the INFORMAS food categories(25), and the NOVA classification systems(26). Alcoholic  
147 beverages were not included in the food categorizations and were reported as a separate group. The  
148 INFORMAS food categorization classifies foods into core (healthy) and non-core (unhealthy) food  
149 categories (25), (26), (27). Examples of core foods are fruits and vegetables, while non-core foods are  
150 unhealthier food options such as sugar-sweetened beverages. The NOVA food classification system  
151 classifies foods into i) unprocessed/minimally processed which are foods in their raw state that have  
152 undergone no industrialization processes and have no added sugars and salts ii) processed culinary  
153 ingredients, iii) processed foods, and iv) Ultra-processed foods(UPFs)(28). Additionally, the food  
154 categories were further subcategorized into a binary variable: UPFs and not UPFs.

## 155 **Statistical analysis**

156 The analysis was guided by the INFORMAS protocol (28). Descriptive statistics were used to  
157 show the distribution of foods advertised by counties, SES areas, and other characteristics such as



158 school types and levels and level of urbanization. We used median and interquartile ranges to assess  
159 the extent of advertisements around schools. The outcome of the study was the extent of advertisements  
160 of core (healthy) and non-core (unhealthy) foods, and UPFs advertisements around schools. The  
161 predictor variables included counties, SES levels, rural/urban settings, school type, school population,  
162 and the gender of the student population within the schools. The multivariable Poisson regression  
163 models were used to determine the association between the count of food and beverages advertised  
164 around the schools and other characteristics such as SES status and school type. We adjusted for  
165 clustering within the individual sub-counties in the Poisson regression models to account for the  
166 differences in the settings of these regions. Post-estimations were conducted to assess the validity of  
167 the models.

## 168 *Ethical approvals*

169 The study protocol was approved by the AMREF-Health Ethics and Scientific Review  
170 Committee in Kenya (ESRC/P901/2020) and the National Commission for Science, Technology,  
171 (NACOSTI- P/22/19104). Permission and mobilization were done to the school heads and subcounty  
172 level administration.

173

## 174 **Results**

### 175 **School characteristics description**

176 Advertising was assessed around all 500 schools: Nairobi county schools (n=215, 43.0%),  
177 Baringo county schools (n=173, 34.6%), and Mombasa county schools (n=112, 22.4%). More than  
178 50% of the schools were public schools, while 78.4% were primary schools (**Table 1**). Nearly two-  
179 thirds of the schools were from urban settings while most schools (>90%) were mixed gender (both  
180 male and female pupils). According to the SES assessment of the schools, 60.0% of them were in the

181 lower SES (**Table 1**). The Mean (SD) school population in all the counties was 384.2(429.1) pupils.  
182 The schools had entrances ranging from 1 to 8.

183

184 **Table 1: School characteristics in Nairobi, Mombasa, and Baringo Counties**

| Variable                               | Description      | Frequency                     |
|----------------------------------------|------------------|-------------------------------|
|                                        |                  | (Percentage) (N=500)<br>n (%) |
| <b>County</b>                          | Nairobi          | 215 (43.0)                    |
|                                        | Mombasa          | 112 (22.4)                    |
|                                        | Baringo          | 173 (34.6)                    |
| <b>School ownership</b>                | Private school   | 238 (47.6)                    |
|                                        | Public school    | 262 (52.4)                    |
| <b>School type</b>                     | Primary school   | 392 (78.4)                    |
|                                        | Secondary school | 108 (21.6)                    |
| <b>School setting</b>                  | Urban            | 323 (64.6)                    |
|                                        | Rural            | 177 (35.4)                    |
| <b>Gender of pupils in the schools</b> | Boys school      | 20 (4.0)                      |
|                                        | Girls school     | 15 (3.0)                      |
|                                        | Mixed school     | 465 (93.0)                    |
| <b>School population</b>               | Mean (SD), range | 384.2 (429.1), (114, 3600)    |
| <b>School SES area</b>                 | Lower SES        | 300 (60.0)                    |
|                                        | Higher SES       | 200 (40.0)                    |
| <b>Number of school entrances</b>      | Mean (SD), range | 1.3 (0.8), (1, 8)             |

185

186

## 187 **Extent of advertisements around schools**

188 We observed a total of 2300 food and beverage advertisements, most of them from Nairobi  
189 county (n=1256; 54.8%), followed by Mombasa county (n=878; 38.2%), and the fewest from Baringo  
190 county (n=166; 7.2%). The food and beverage products were more advertised in Mombasa  
191 (Median=25, Interquartile range (IQR)= 12, 78) and Nairobi counties (Median=25, IQR=6, 69), and  
192 lower in Baringo county (Median=8, IQR; 5, 14) (**Table 2**). We observed a higher number of food and

193 beverage advertisements in urban areas (Median=30, range= 25, 160), in higher SES areas  
 194 (Median=25, IQR=12, 69), and around private primary schools (Median=19, IQR: 15, 92) (**Table 2**).  
 195 We found a lower median number of advertisements around private secondary schools and public  
 196 secondary schools.

197 **Table 2: Median number of food and beverage advertisements around a 250 m radius around**  
 198 **schools by county, SES levels, and school type in Nairobi, Mombasa, and Baringo counties**

| Variable              | Characteristics   | Number of schools (N=500) | Median advertisements around schools | (25th, 75-percentiles) |
|-----------------------|-------------------|---------------------------|--------------------------------------|------------------------|
| <b>County</b>         |                   |                           |                                      |                        |
|                       | Nairobi county    | 215                       | 25                                   | (12,78)                |
|                       | Mombasa county    | 112                       | 25                                   | (7, 69)                |
|                       | Baringo county    | 173                       | 8                                    | (5, 15)                |
| <b>School setting</b> |                   |                           |                                      |                        |
|                       | Urban             | 323                       | 30                                   | (25, 160)              |
|                       | Rural             | 177                       | 10                                   | (4, 13)                |
| <b>SES level</b>      |                   |                           |                                      |                        |
|                       | Lower SES         | 300                       | 22                                   | (11, 83)               |
|                       | Higher SES        | 200                       | 25                                   | (12, 69)               |
| <b>School type</b>    |                   |                           |                                      |                        |
|                       | Private primary   | 190                       | 19                                   | (15, 92)               |
|                       | Public primary    | 202                       | 16                                   | (8, 35)                |
|                       | Private Secondary | 48                        | 10                                   | (4, 14)                |
|                       | Public secondary  | 60                        | 6                                    | (3, 15)                |

199

## 200 **Features of food and beverage advertisements**

201 Table 3 shows the characteristics of food and beverage advertisements. In all the counties,  
 202 85.5% of all food and beverage advertisements were within food stores. Approximately 5.8% and 5.4%  
 203 of these advertisements were located on buildings, and along the roads, respectively. Advertisements  
 204 were mainly displayed as posters and banners (60.6%), followed by store merchandising (25.4%), and  
 205 painted buildings/walls (8.4%). Most food and beverage advertisements were promoted as single  
 206 products (61.8%), and 16.0% promoted more than three food product types (**Table 3**). The most

207 common content of the advertisements (86.7%) was combined logos, pictorials, and text. About 46.5%  
 208 of the advertisements were small-sized, and 38.2% and 15.2% were medium- and large-sized,  
 209 respectively.

210 **Table 3: Techniques for food advertising in/around schools in Nairobi, Mombasa, and Baringo**  
 211 **Counties.**

|                                                 | <i>Description</i>                      | <i>Frequency (%)</i> |         |
|-------------------------------------------------|-----------------------------------------|----------------------|---------|
| <b>Setting of advertisement</b>                 | Food shop                               | 1,966                | (85.5%) |
|                                                 | Road                                    | 125                  | (5.4%)  |
|                                                 | Building                                | 133                  | (5.8%)  |
|                                                 | Bus shelter/ bus stage/bus stop/train   | 2                    | (0.1%)  |
|                                                 | Mobile cart/stall or vending machine    | 17                   | (0.7%)  |
|                                                 | Other specify <sup>a</sup>              | 57                   | (2.5%)  |
| <b>Format of advertisement</b>                  | Billboard                               | 86                   | (3.7%)  |
|                                                 | Poster or banner                        | 1,393                | (60.6%) |
|                                                 | Standing sign                           | 30                   | (1.3%)  |
|                                                 | Painted building/wall                   | 192                  | (8.4%)  |
|                                                 | Digital signs / LED                     | 10                   | (0.4%)  |
|                                                 | Store merchandising                     | 583                  | (25.4%) |
|                                                 | Others specify <sup>b</sup>             | 6                    | (0.3%)  |
| <b>Number of product types in advertisement</b> | None (only company/brand mentioned)     | 82                   | (3.6%)  |
|                                                 | 1 food product type                     | 1,422                | (61.8%) |
|                                                 | 2 food product types                    | 210                  | (9.1%)  |
|                                                 | 3 food product types                    | 219                  | (9.5%)  |
|                                                 | > 3 food product types                  | 367                  | (16.0%) |
| <b>Content of the advertisement</b>             | Logos/Pictorial                         | 111                  | (4.8%)  |
|                                                 | Text                                    | 195                  | (8.5%)  |
|                                                 | Combined logos, pictorials, and text    | 1994                 | (86.7%) |
| <b>Size of advertisement</b>                    | Small (> A4 but <1.3m X 1.9m)           | 1070                 | (46.5%) |
|                                                 | Medium (<1.3m X 1.9m but < 2.0m X 2.5m) | 878                  | (38.2%) |
|                                                 | Large (2m X 2.5m)                       | 352                  | (15.2%) |

212 Notes: <sup>a</sup> **Other settings include: advertisements on gates, bars, restaurants, and liquor shops.**

213 <sup>b</sup> **Other formats include: Branded moving cars and calendar adverts**

214

215

216

217

218 **Types of foods and beverages advertised using INFORMAS and NOVA**  
 219 **food categories**

220 Table 4 shows the INFORMAS food categorization of the advertisements. About 46.0% of all  
 221 the food and beverage advertisements were unhealthy food options, 46.4% were healthy foods, and  
 222 approximately 5% were in the miscellaneous category. Approximately 3% of all the advertisements  
 223 promoted alcoholic drinks and beverages. In all the counties the most frequently advertised food  
 224 category was sugar-sweetened drinks, which falls in the unhealthy food category, accounting for more  
 225 than 33.1% of all the advertisements. The most commonly advertised healthy food category was meat  
 226 and meat alternatives, which contributed to 12% of all the advertisements (**Table 4**).

227 In Nairobi county, 44.4% of the advertisements were noncore (median=37.5, IQR=16.5, 47.5)  
 228 and 46.7% (median=79, IQR=56, 114) were core foods (**Table 4, 5**). Conversely, 49.8% of the food  
 229 and beverage advertisements in Mombasa county were healthy foods, while the unhealthy foods closely  
 230 contributed to 44.8% of the food and beverage advertisements. In Baringo, unhealthy foods contributed  
 231 approximately 63.9% (median=15, IQR=53, 72) of the food and beverage advertisements in the county  
 232 (**Table 4, 5**). The sugar-sweetened beverages food category was the most commonly advertised in all  
 233 three counties, contributing to approximately 34.2%, 27.5%, and 54.8% of the advertisements in  
 234 Nairobi, Mombasa, and Baringo counties, respectively (**Table 4**). According to the bivariate analysis,  
 235 there were significant differences in the marketing of core and non-core foods by counties, SES  
 236 settings, school settings (urban/rural), and school type.

237 **Table 4: Food categories and distribution by the proportion of food advertisements in/ around**  
 238 **schools in Nairobi, Mombasa, and Baringo Counties.**

| INFORMAS Food Categories                                                             | All<br>(N=2300) |                | Nairobi<br>(N=1256) |                | Mombasa<br>(N=878) |                | Baringo<br>(N=166) |                |
|--------------------------------------------------------------------------------------|-----------------|----------------|---------------------|----------------|--------------------|----------------|--------------------|----------------|
|                                                                                      | #               | %              | #                   | %              | #                  | %              | #                  | %              |
| <b>Core (Healthy) Foods</b>                                                          | <b>1067</b>     | <b>(46.4%)</b> | <b>586</b>          | <b>(46.7%)</b> | <b>437</b>         | <b>(49.8%)</b> | <b>44</b>          | <b>(26.5%)</b> |
| Breads, cereals, rice and rice products<br>without added fat, sugar or salt, noodles | 228             | (9.9%)         | 112                 | (8.9%)         | 99                 | (11.3%)        | 17                 | (10.2%)        |

It is made available under a [CC-BY 4.0 International license](https://creativecommons.org/licenses/by/4.0/) .

|                                                                                                          |                     |                    |                    |                    |
|----------------------------------------------------------------------------------------------------------|---------------------|--------------------|--------------------|--------------------|
| Fruits and fruit products without added fats, sugars, or salt                                            | 92 (4.0%)           | 41 (3.3%)          | 45 (5.1%)          | 6 (3.6%)           |
| Vegetables and vegetable products without added fats, sugars, or salt                                    | 141 (6.1%)          | 71 (5.7%)          | 68 (7.7%)          | 2 (1.2%)           |
| Milks and yoghurts ( $\leq 3$ g fat /100g), cheese ( $\leq 15$ g fat /100g), and their alternatives      | 179 (7.8%)          | 149 (11.9%)        | 25 (2.9%)          | 5 (3.0%)           |
| Meat and meat alternatives - include meat, poultry, fish, legumes, eggs and raw unsalted nuts            | 281 (12.2%)         | 116 (9.2%)         | 165 (18.8%)        | - -                |
| Oils high in mono- or polyunsaturated fats, and low-fat savoury sauces ( $< 10$ g fat /100g)             | 30 (1.3%)           | 18 (1.4%)          | 5 (0.6%)           | 7 (4.2%)           |
| Bottled water (including unflavoured mineral and soda waters)                                            | 116 (5.0%)          | 79 (6.3%)          | 30 (3.4%)          | 7 (4.2%)           |
| <b>Non-Core (unhealthy) Foods</b>                                                                        | <b>1057 (46.0%)</b> | <b>558 (44.4%)</b> | <b>393 (44.8%)</b> | <b>106 (63.9%)</b> |
| Sweetbreads, cakes, muffins, sweet buns, sweet biscuits, pies and pastries                               | 148 (6.4%)          | 54 (4.3%)          | 79 (9.0%)          | 15 (9.0%)          |
| Meat and meat alternatives processed or preserved in salt                                                | 25 (1.1%)           | 9 (0.7%)           | 16 (1.8%)          | - -                |
| Sweet snack foods                                                                                        | 18 (0.8%)           | 14 (1.1%)          | 4 (0.5%)           | - -                |
| Savory snack foods (added salt or fat)                                                                   | 38 (1.7%)           | 24 (1.9%)          | 14 (1.6%)          | - -                |
| High fat/salt meals - frozen or packaged meals ( $> 6$ g saturated fat /serve, $> 900$ mg sodium /serve) | 67 (2.9%)           | 28 (2.2%)          | 39 (4.4%)          | - -                |
| Sugar-sweetened drinks - include soft drinks, sweetened tea drinks                                       | 761 (33.1%)         | 429 (34.2%)        | 241 (27.5%)        | 91 (54.8%)         |
| <b>Miscellaneous foods</b>                                                                               | <b>109 (4.7%)</b>   | <b>65 (5.2%)</b>   | <b>28 (3.2%)</b>   | <b>16 (9.6%)</b>   |
| Recipe additions (including soup cubes, oils, dried herbs, and seasonings)                               | 19 (0.8%)           | 14 (1.1%)          | 4 (0.5%)           | 1 (0.6%)           |
| Tea and coffee (excluding sweetened powder-based teas or coffees)                                        | 90 (3.9%)           | 51 (4.1%)          | 24 (2.7%)          | 15 (9.0%)          |
| <b>Alcohol</b>                                                                                           | <b>67 (2.9%)</b>    | <b>47 (3.7%)</b>   | <b>20 (2.3%)</b>   | <b>- -</b>         |

239

240 **Table 5: Healthiness of food and beverage categories advertised by school characteristics.**

| Variable              | Characteristics | Core (healthy) foods         | Non-core (unhealthy) foods   | Miscellaneous                | P-value |
|-----------------------|-----------------|------------------------------|------------------------------|------------------------------|---------|
|                       |                 | Median (25th, 75 percentile) | Median (25th, 75 percentile) | Median (25th, 75 percentile) |         |
| <b>County</b>         |                 |                              |                              |                              | 0.000   |
|                       | Nairobi county  | 79(56, 114)                  | 37.5(16.5, 47.5)             | 32.5(23.25, 41.75)           |         |
|                       | Mombasa county  | 45(26.25, 68.0)              | 20(14.5, 39.0)               | 14(9.0, 19.0)                |         |
|                       | Baringo county  | 7(5.25, 7.0)                 | 15(53, 72)                   | 8(4.5, 11.5)                 |         |
| <b>School setting</b> |                 |                              |                              |                              | 0.000   |
|                       | Urban           | 136(99, 191)                 | 67(31, 101.5)                | 46(31.5, 60.5)               |         |
|                       | Rural           | 5(4, 5)                      | 12(6.5, 49.5)                | 8.5(5.25, 11.75)             |         |
| <b>SES level</b>      |                 |                              |                              |                              | 0.000   |
|                       | Lower SES       | 73(37.5, 113.5)              | 14(13.5, 52.5)               | 29(20, 38)                   |         |

|                    |               |                 |                    |       |
|--------------------|---------------|-----------------|--------------------|-------|
| Higher SES         | 62(45, 103.5) | 26(18, 68.5)    | 25.5(16.75, 34.25) | 0.000 |
| <b>School type</b> |               |                 |                    |       |
| Private primary    | 95(63, 127.5) | 35(22.5, 56.0)  | 25.5(17.75, 33.25) |       |
| Public primary     | 25(17, 30.5)  | 10(5, 35)       | 17.5(11.25, 23.75) |       |
| Private secondary  | 12(8.5, 15.5) | 11(4.75, 14.25) | 5.5(3.25, 7.75)    |       |
| Public secondary   | 11(8, 25.5)   | 5(3, 7)         | 6(4.5, 7.5)        |       |

241 *Notes: P-Value from chi-square tests for checking differences in proportions of food categories by different*  
 242 *variables such as SES levels*

243

244 According to the NOVA food categorization, nearly equal proportions of the advertisements  
 245 were for UPFs versus unprocessed/minimally processed (49% versus 48%) in all the counties. (**Figure**  
 246 **2**). In Mombasa unprocessed/minimally processed were advertised more (52%) than UPF, while in  
 247 Baringo 64% of the advertisements were UPF.

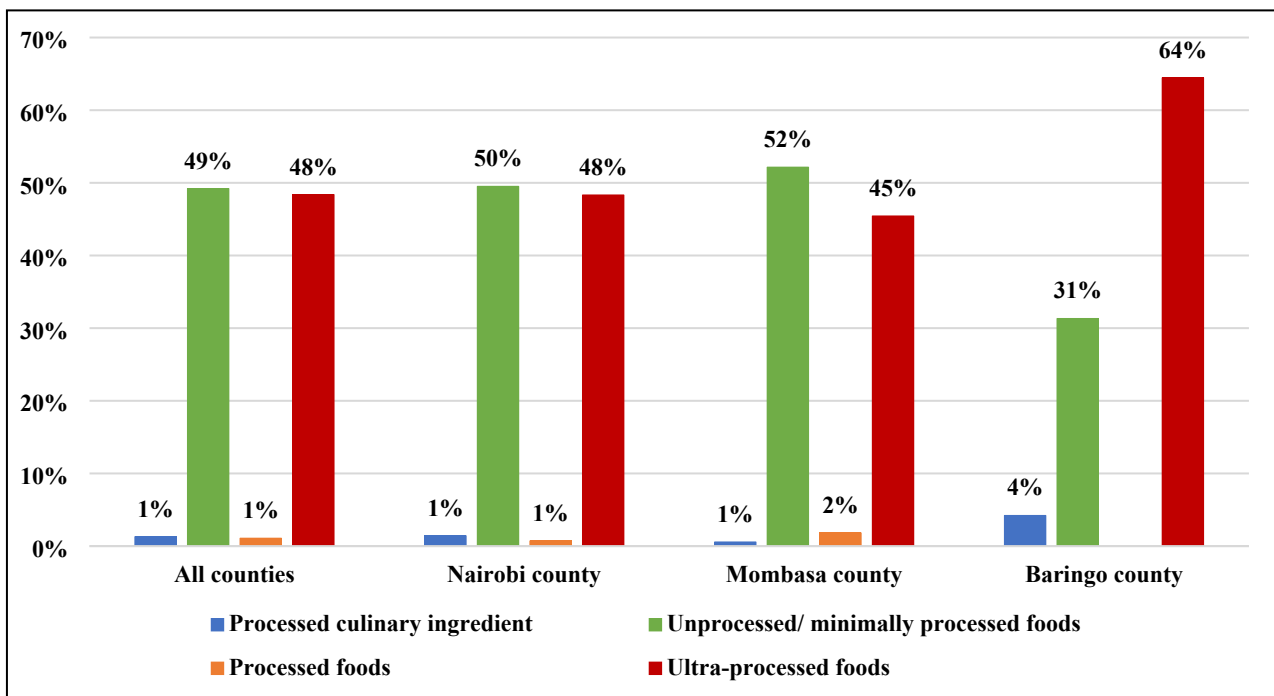

248

249 *Figure 2: The proportion (%) of advertised foods and beverages by NOVA food categories and*  
 250 *counties.*

251

## 252 Description of promotional/marketing strategies in the advertisements

253 About 62.3% of the advertisements had no promotional character's present. Among those with  
254 promotional characters, cartoon or company-owned characters were the most frequently observed  
255 promotional strategy (37.2%). Other observed promotional methods accounting for 2.0% of the  
256 advertisements included famous sports persons (n=2), sports events (n=4), movie titles (n=2), and  
257 advertisements for children, e.g. images of a child (n=14). The most common premium offers in the  
258 advertisements were price discounts (n=49) and limited editions, e.g. last stock (n=33). Other premium  
259 offers observed include: contests (n=6) buy one get one free (n=5), gift or collectibles (n=5), and 20%  
260 extra (n=4).

## 261 **Factors associated with UPF advertisements around schools**

262 There was a significantly higher level of advertisements of UPFs in Baringo County  
263 (prevalence rate ratios (PRR): 1.28, 95% CI: 1.01-1.20) compared to urban Nairobi County (**Table 6**).  
264 We observed a significantly higher level UPFS advertisements in Lower SES settings (PRR: 1.10, 95%  
265 CI: 1.01-1.20).

266 **Table 6: Multivariate Poisson regression output for factors associated with levels of advertisements**  
267 **of ultra-processed foods and beverages in Nairobi, Mombasa, and Baringo counties.**

|                       | <i>PRR</i> | <i>95% CI</i> | <i>P-value</i> |
|-----------------------|------------|---------------|----------------|
| <b>County</b>         |            |               |                |
| Ref: Nairobi county   | 1          | 1             | 1              |
| Baringo county        | 1.28       | [1.00-1.63]   | 0.048          |
| Mombasa county        | 0.99       | [0.90-1.09]   | 0.872          |
| <b>SES level</b>      |            |               |                |
| Ref: High SES         | 1          | 1             | 1              |
| Lower SES             | 1.10       | [1.01-1.20]   | 0.035          |
| <b>School Setting</b> |            |               |                |
| Ref: Urban            | 1          | 1             | 1              |
| Rural                 | 1.05       | [0.83-1.34]   | 0.676          |
| <b>School type</b>    |            |               |                |
| Ref: Primary school   | 1          | 1             | 1              |
| Secondary schools     | 1.04       | [0.94-1.15]   | 0.451          |

268 **Notes: PRR- Prevalence rate ratios CI-Confidence Interval; SES-Socioeconomic status**

269

270



271

272

273

274

275

## 276 **Discussion**

277         We observed a high level of marketing of UPFs and other unhealthy food and beverages around  
278 schools in Kenya, with nearly half of all the food advertisements rated as unhealthy. There was a  
279 substantial strategic placement of advertisements around the 250m radius around schools, with the  
280 highest numbers being observed in the urban counties (Nairobi and Mombasa) and around primary  
281 schools. This is consistent with findings from studies in other countries where there were varying  
282 densities of advertisements by SES locations and in urban areas compared to peri-urban neighborhoods  
283 (14,18,21). Our findings identified a significantly high level of advertisements in lower-SES areas in  
284 the various counties, which is similar to a study conducted in Ghana using the same methodology (18).  
285 These findings show that urban settings and both lower and higher SES locations are targeted by food  
286 and beverage industries.

287         Nearly half of the advertisements around schools were in the UPF/unhealthy food category,  
288 showing a substantial exposure of children to unhealthy foods, a similar trend reported  
289 elsewhere(12,18,21,29). Different studies from LMICs have consistently shown that most  
290 advertisements for unhealthy foods strategically target children (12,13,15,30). These child-directed  
291 advertisements of unhealthy foods are a great public health concern as they increase the consumption  
292 of unhealthy foods which will consequently increase the risk of nutrition-related NCDs (4,31,32).

293         The most commonly advertised unhealthy food in this study was sugar-sweetened drinks  
294 followed by sweetened bread, cakes, and savory snacks. Most studies conducted around schools have  
295 shown a high level of promotion of sugar-sweetened beverages to children (18,21). Studies conducted

296 in urban Uganda and Ghana using the INFORMAS methods showed a high level of promotion of  
297 unhealthy foods, with sugar-sweetened beverages being the most advertised product (18,21). The high  
298 level of exposure to unhealthy food advertisements creates significant risks of poor dietary choices and  
299 consequential health-harming implications for children (4,33,34).

300 Surprisingly, 3% of the advertisements were for alcohol, which is restricted to advertising to children  
301 in Kenya (35). Alcohol advertisements around schools have also been observed in Uganda and Ghana,  
302 and these advertisements are associated with an increased likelihood of consumption of alcohol by  
303 children (18,21,36).

304 The majority of the advertisements in this study were strategically placed in the food  
305 shops/kiosks around the schools and were mostly in the form of posters and banners. Most children  
306 purchase both food and non-food products from shops around school, implying that they are exposed  
307 to advertisements for unhealthy foods. These findings are consistent with the study conducted in  
308 Ghana, where the majority of advertisements around schools were mainly placed in food shops(18).  
309 Modern retail outlets and shops are associated with increased exposure and prominence of unhealthy  
310 food categories and make different products and brands easily accessible for purchase by children  
311 (18,37,38).

312 Posters and banners are a marketing strategy used to make clear messaging about products,  
313 that can be multiply viewed by the target market. As observed in previous studies, physical  
314 advertisements using posters and banners improve the proximity and awareness of the food items being  
315 advertised and influence the purchase and consumption of these products (18,39,40). This study shows  
316 the diversified marketing landscape and its strategic target to vulnerable populations such as children  
317 stressing the need for regulations encompassing the marketing strategies, placement, content, and type  
318 of advertisements exposed to different populations. The most common promotional strategies used in  
319 this study were the cartoon or company-owned characters hence improving the appeal of the

320 advertisements to children. Some studies have shown that the use of cartoon and company-owned  
321 characters and mascots enhanced the purchase, and consumption of unhealthy foods, and consequential  
322 poor health outcomes (9,10).

323

324

## 325 **Policy implications**

326 This study illustrates the marketing of UPFs around schools in different geographical contexts  
327 in Kenya. The promotion and marketing of unhealthy foods can influence the perception of the product  
328 and thus increase the purchase intention of children or pester power to caregivers by children.  
329 Consequently, this leads to the consumption of unhealthy foods associated with poor health outcomes  
330 such as overweight/obesity, and NR-NCDs among children and adults. The marketing of unhealthy  
331 foods, specifically targeting children has been widespread around school neighborhoods. The  
332 marketing strategies have been improved and mirror the methods used in HICs as the industrialization  
333 and modernization of food environments take their roots in LMICs.

334 This study contributes to the knowledge of the landscape assessment of marketing around  
335 school neighborhoods, with a comparison between rural and urban areas of Kenya. The most worrying  
336 observation is the targeting of younger children in primary schools, rural schools, and schools in low  
337 SES urban areas. This study calls for a multisectoral approach toward the regulation of unhealthy food  
338 advertising in school settings regardless of their location and socio-economic status. There is a need  
339 to sensitize school authorities about the dangers of advertising unhealthy foods to children to stimulate  
340 local restrictions on such advertisements by the schools. At the school level continuous advocacy,  
341 sensitization, and education on predatory marketing of unhealthy foods, and the health-harming  
342 implications should be done to counter the marketing campaigns in school neighborhoods. There needs

343 to be a great focus by the policymakers on the high level of advertisements of sugar-sweetened  
344 beverages and alcoholic beverages around schools, as elucidated in this study. The rights-based  
345 approach can be implemented as recommended by WHO where it is recommended that marketing  
346 around settings where children gather should be free of marketing of unhealthy foods (41).

347

348

## 349 **Strengths and Limitations**

350 This is the first study in Kenya assessing marketing in neighborhoods where children gather,  
351 hence making it novel. This study is unique in that it entails findings of marketing around school  
352 neighborhoods from both rural and urban regions in an LMIC setting. Most marketing assessment  
353 studies have been conducted in HICs and urban areas of a few countries in Africa. Hence, the study  
354 shows a comparative assessment of the Kenyan urban and rural contexts showing a high penetration  
355 of UPFs advertisements targeting children. The main limitation of the study was that it was conducted  
356 during the COVID-19 period, with numerous restrictions/lockdowns which might have impacted the  
357 number of advertisements during the study period. However, most of the advertisements displayed  
358 before COVID-19 were available during the survey. So, it is possible that we did not miss a substantial  
359 number of advertisements during the study period.

## 360 **Conclusion**

361 The findings from this study illustrate the high level of exposure to unhealthy foods and  
362 beverages targeting children in both urban and rural settings in Kenya. There is a concerning  
363 observation on the use of innovative techniques of marketing around schools, and the widespread  
364 advertisement of sugar-sweetened beverages, especially in rural settings. There is an urgent need for  
365 the formulation of national policies on the regulation of marketing of unhealthy foods to children,

366 around school environments. Targeted awareness, and sensitization are needed at the school level to  
367 inform the children and teachers on the existing marketing of unhealthy foods targeting children.

368

## 369 **Acknowledgments**

370 The authors acknowledge the Ministries of Health and Education in Kenya, and the county  
371 governments of Nairobi, Mombasa, and Baringo for supporting the research in the country and in  
372 specific counties. We also acknowledge the research assistants who supported data collection.

## 373 **References**

- 374 1. Ford ND, Patel SA, Narayan KMV. Obesity in low-and middle-income countries: burden,  
375 drivers, and emerging challenges. *Annu Rev Public Health*. 2017;38:145–64.
- 376 2. Templin T, Cravo Oliveira Hashiguchi T, Thomson B, Dieleman J, Bendavid E. The  
377 overweight and obesity transition from the wealthy to the poor in low-and middle-income  
378 countries: A survey of household data from 103 countries. *PLoS Med*. 2019;16(11):e1002968.
- 379 3. World Health Organization. Marketing of unhealthy foods and drinks [Internet]. [cited 2024  
380 Apr 24]. Available from: [https://www.emro.who.int/nutrition/marketing-of-unhealthy-](https://www.emro.who.int/nutrition/marketing-of-unhealthy-foods/index.html)  
381 [foods/index.html](https://www.emro.who.int/nutrition/marketing-of-unhealthy-foods/index.html)
- 382 4. Sadeghirad B, Duhaney T, Motaghipisheh S, Campbell NRC, Johnston BC. Influence of  
383 unhealthy food and beverage marketing on children’s dietary intake and preference: a  
384 systematic review and meta-analysis of randomized trials. *Obes Rev*. 2016;17(10):945–59.
- 385 5. Cairns G, Angus K, Hastings G, Caraher M. Systematic reviews of the evidence on the nature,  
386 extent and effects of food marketing to children. A retrospective summary. *Appetite* [Internet].  
387 2013;62:209–15. Available from:  
388 <https://www.sciencedirect.com/science/article/pii/S0195666312001511>
- 389 6. Smith R, Kelly B, Yeatman H, Boyland E. Food Marketing Influences Children’s Attitudes,  
390 Preferences and Consumption: A Systematic Critical Review. Vol. 11, *Nutrients*. 2019.
- 391 7. Sonntag D, Schneider S, Mdege N, Ali S, Schmidt B. Beyond Food Promotion: A Systematic  
392 Review on the Influence of the Food Industry on Obesity-Related Dietary Behaviour among  
393 Children. Vol. 7, *Nutrients*. 2015. p. 8565–76.

- 394 8. Backholer K, Gupta A, Zorbas C, Bennett R, Huse O, Chung A, et al. Differential exposure to,  
395 and potential impact of, unhealthy advertising to children by socio-economic and ethnic  
396 groups: A systematic review of the evidence. *Obes Rev.* 2021;22(3):e13144.
- 397 9. Roberto CA, Baik J, Harris JL, Brownell KD. Influence of licensed characters on children's  
398 taste and snack preferences. *Pediatrics.* 2010;126(1):88–93.
- 399 10. Kraak VI, Story M. Influence of food companies' brand mascots and entertainment  
400 companies' cartoon media characters on children's diet and health: a systematic review and  
401 research needs. *Obes Rev.* 2015;16(2):107–26.
- 402 11. Spires M, Berggreen-Clausen A, Kasujja FX, Delobelle P, Puoane T, Sanders D, et al.  
403 Snapshots of urban and rural food environments: EPOCH-based mapping in a high-, middle-,  
404 and low-income country from a non-communicable disease perspective. *Nutrients.*  
405 2020;12(2):484.
- 406 12. Vandevijvere S, Molloy J, Hassen de Medeiros N, Swinburn B. Unhealthy food marketing  
407 around New Zealand schools: a national study. *Int J Public Health.* 2018;63:1099–107.
- 408 13. Kelly B, Cretikos M, Rogers K, King L. The commercial food landscape: outdoor food  
409 advertising around primary schools in Australia. *Aust N Z J Public Health.* 2008;32(6):522–8.
- 410 14. Adams J, Ganiti E, White M. Socio-economic differences in outdoor food advertising in a city  
411 in Northern England. *Public Health Nutr.* 2011;14(6):945–50.
- 412 15. Kelly B, King L, Jamiyan B, Chimedtseren N, Bold B, Medina VM, et al. Density of outdoor  
413 food and beverage advertising around schools in Ulaanbaatar (Mongolia) and Manila (The  
414 Philippines) and implications for policy. *Crit Public Health.* 2015;25(3):280–90.

- 415 16. Puspikawati SI, Dewi DMSK, Astutik E, Kusuma D, Melaniani S, Sebayang SK. Density of  
416 outdoor food and beverage advertising around gathering place for children and adolescent in  
417 East Java, Indonesia. *Public Health Nutr.* 2021;24(5):1066–78.
- 418 17. Hillier A, Cole BL, Smith TE, Yancey AK, Williams JD, Grier SA, et al. Clustering of  
419 unhealthy outdoor advertisements around child-serving institutions: a comparison of three  
420 cities. *Health Place.* 2009;15(4):935–45.
- 421 18. Amevinya GS, Vandevijvere S, Kelly B, Afagbedzi SK, Aryeetey R, Adjei AP, et al.  
422 Advertising of unhealthy foods and beverages around primary and junior high schools in  
423 Ghana’s most urbanized and populous region. *Front public Heal.* 2022;10:917456.
- 424 19. Chacon V, Letona P, Villamor E, Barnoya J. Snack food advertising in stores around public  
425 schools in Guatemala. *Crit Public Health.* 2015;25(3):291–8.
- 426 20. Norov B, Cristobal-Maramag C, Van Minh H, Long KQ, Huse O, Nkoroi A, et al. Prevention  
427 of childhood overweight and obesity in Mongolia, the Philippines and Vietnam: identifying  
428 priority actions. *Health Promot Int.* 2023;38(6):daad187.
- 429 21. Dia OEW, Løvhaug AL, Rukundo PM, Torheim LE. Mapping of outdoor food and beverage  
430 advertising around primary and secondary schools in Kampala city, Uganda. *BMC Public*  
431 *Health.* 2021;21:1–12.
- 432 22. Mackay S, Molloy J, Vandevijvere S. INFORMAS protocol: Outdoor advertising (school  
433 zones). *J Contrib* <https://doi.org/10.17608/k6> *Auckl.* 2017;5701102(November):v2–v2.
- 434 23. Statistics KNB of. Kenya Population and Housing Census Results [Internet]. Kenya National  
435 Bureau of Statistics. 2019. Available from: <https://www.knbs.or.ke/?p=5621>



- 436 24. Dietary Transition Project. Dietary Transitions in Ghanaian Cities :Leveraging Evidence for  
437 Policy and Intervention to Prevent Diet-Related Non-Communicable Diseases. 2019;1–16.
- 438 25. Kelly B. INFORMAS Protocol: Food Promotion Module: Food Marketing-Television  
439 Protocol. 2017;
- 440 26. Amevinya GS, Vandevijvere S, Kelly B, Afagbedzi SK, Aryeetey R, Adjei AP, et al.  
441 Advertising of unhealthy foods and beverages around primary and junior high schools in  
442 Ghana’s most urbanized and populous region. *Front public Heal*. 2022;10:917456.
- 443 27. Monteiro C, Cannon G, Lawrence M, Louzada ML, Machado P. FAO. Ultra-processed foods,  
444 diet quality, and health using the NOVA classification system. 2019 Aug 1;
- 445 28. Mhurchu PC. INFORMAS Protocol: Food Retail Module - Retail Instore Food Availability  
446 [Internet]. 2017. Available from:  
447 [https://auckland.figshare.com/articles/journal\\_contribution/INFORMAS\\_Protocol\\_Food\\_Retai](https://auckland.figshare.com/articles/journal_contribution/INFORMAS_Protocol_Food_Retail_Module_-_Retail_Instore_Food_Availability/5662060)  
448 [l\\_Module\\_-\\_Retail\\_Instore\\_Food\\_Availability/5662060](https://auckland.figshare.com/articles/journal_contribution/INFORMAS_Protocol_Food_Retail_Module_-_Retail_Instore_Food_Availability/5662060)
- 449 29. Amevinya GS, Quarpong W, Laar A. Commercial food advertising on the campus of Ghana’s  
450 largest University. *World Nutr*. 2020;11(2):57–73.
- 451 30. Battersby J, Peyton S. The geography of supermarkets in Cape Town: Supermarket expansion  
452 and food access. In: *Urban forum*. Springer; 2014. p. 153–64.
- 453 31. Barquera S, Hernández-Barrera L, Rothenberg SJ, Cifuentes E. The obesogenic environment  
454 around elementary schools: food and beverage marketing to children in two Mexican cities.  
455 *BMC Public Health*. 2018;18:1–9.
- 456 32. Folkvord F, Hermans RCJ. Food marketing in an obesogenic environment: a narrative

- 457 overview of the potential of healthy food promotion to children and adults. *Curr Addict*  
458 *Reports*. 2020;7:431–6.
- 459 33. Rousham EK, Goudet S, Markey O, Griffiths P, Boxer B, Carroll C, et al. Unhealthy food and  
460 beverage consumption in children and risk of overweight and obesity: a systematic review and  
461 meta-analysis. *Adv Nutr*. 2022;13(5):1669–96.
- 462 34. Lesser LI, Zimmerman FJ, Cohen DA. Outdoor advertising, obesity, and soda consumption: a  
463 cross-sectional study. *BMC Public Health*. 2013;13:1–7.
- 464 35. Unicef. Marketing of Unhealthy Foods to Children. 2021;2060(April):1–5. Available from:  
465 [http://www.irishheart.ie/iopen24/marketing-unhealthy-foods-children-t-38\\_1319\\_263.html](http://www.irishheart.ie/iopen24/marketing-unhealthy-foods-children-t-38_1319_263.html)
- 466 36. Pasch KE, Komro KA, Perry CL, Hearst MO, Farbakhsh K. Outdoor alcohol advertising near  
467 schools: what does it advertise and how is it related to intentions and use of alcohol among  
468 young adolescents? *J Stud Alcohol Drugs*. 2007;68(4):587–96.
- 469 37. Kelly B, King MPsy L, Chapman Mnd K, Boyland E, Bauman AE, Baur LA. A hierarchy of  
470 unhealthy food promotion effects: identifying methodological approaches and knowledge  
471 gaps. *Am J Public Health*. 2015 Apr;105(4):e86-95.
- 472 38. Adjei AP, Amevinya GS, Quarpong W, Tandoh A, Aryeetey R, Holdsworth M, et al.  
473 Availability of healthy and unhealthy foods in modern retail outlets located in selected districts  
474 of Greater Accra Region, Ghana. *Front Public Heal*. 2022;10:1–11.
- 475 39. Isgor Z, Powell L, Rimkus L, Chaloupka F. Associations between retail food store exterior  
476 advertisements and community demographic and socioeconomic composition. *Health Place*.  
477 2016;39:43–50.

478 40. Settle PJ, Cameron AJ, Thornton LE. Socioeconomic differences in outdoor food advertising  
479 at public transit stops across Melbourne suburbs. Aust N Z J Public Health. 2014;38(5):414–8.

480 41. Organization WH. A framework for implementing the set of recommendations on the  
481 marketing of foods and non-alcoholic beverages to children. World Health Organization;  
482 2012.

483

484

485

486

487

488

489

490

491

492

493

494

## FIGURES

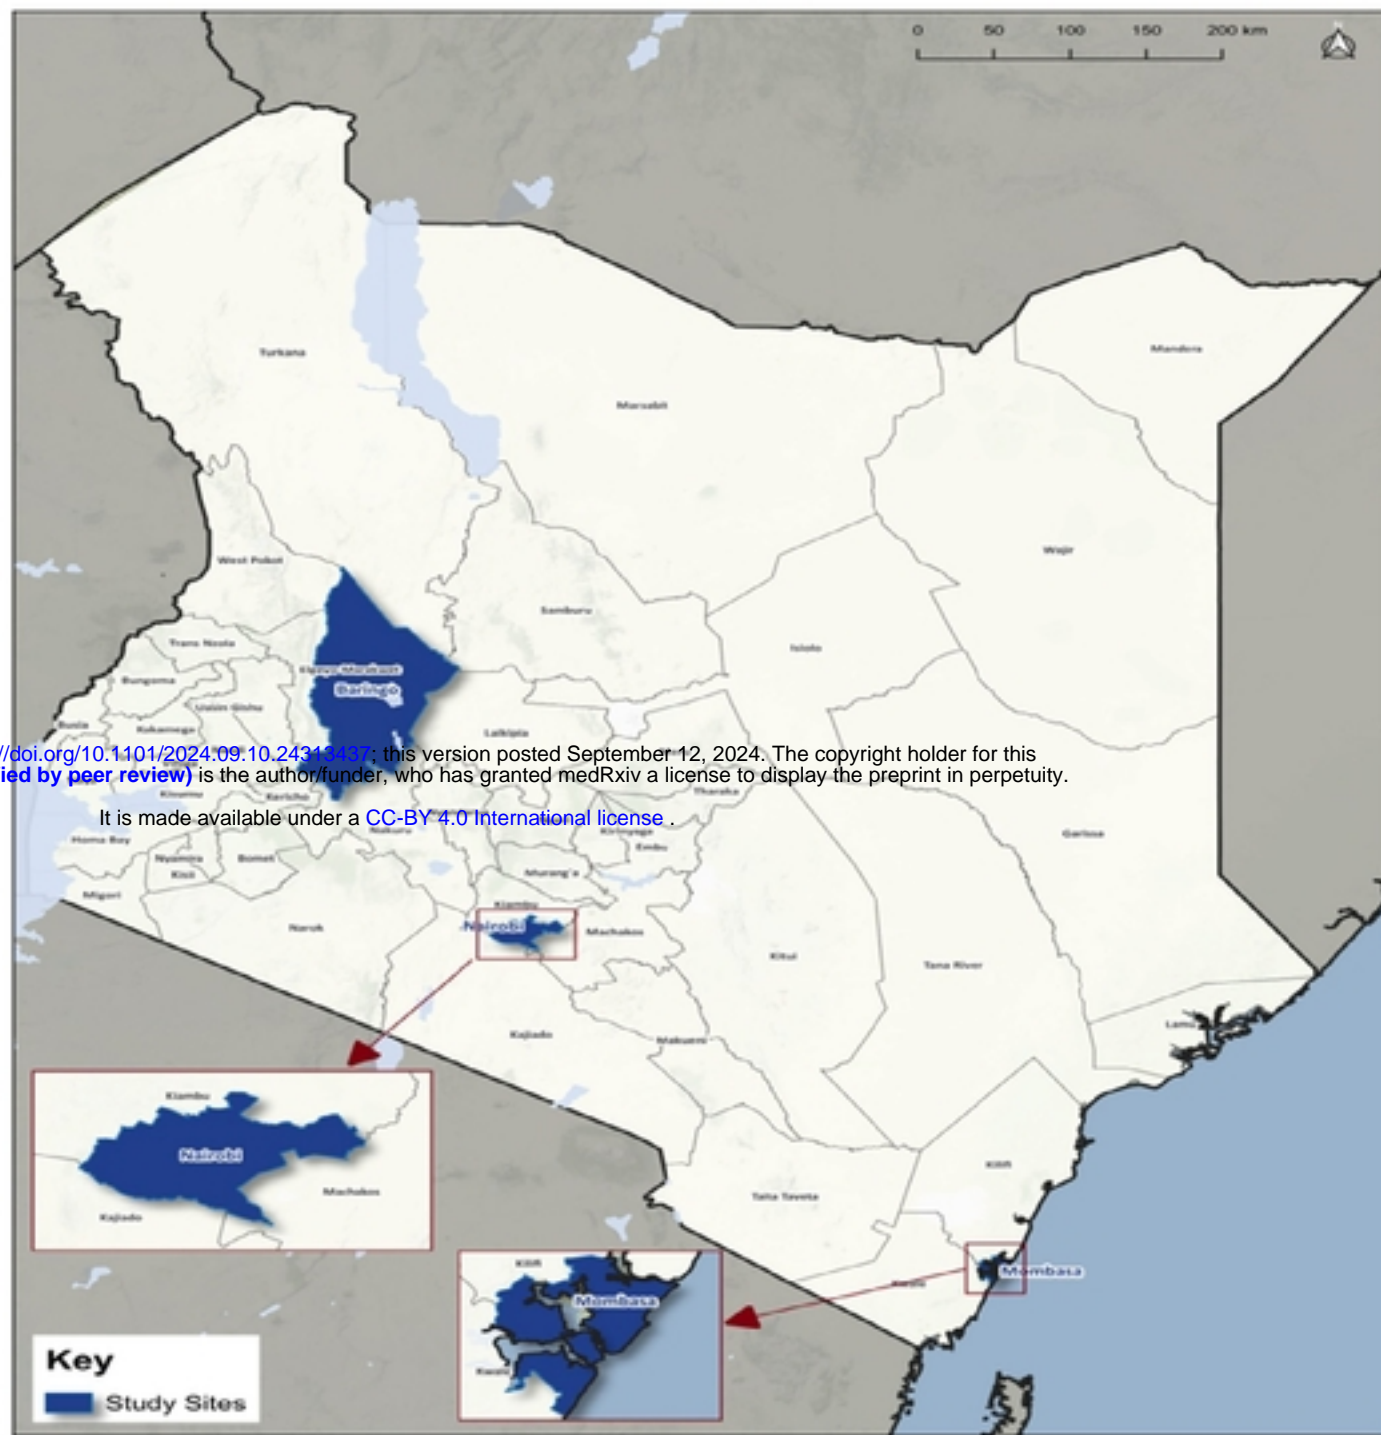

**Figure 1: Map of Kenya showing the counties selected for assessing food availability and marketing at modern food retailers in 2021**

medRxiv preprint doi: <https://doi.org/10.1101/2024.09.10.24313437>; this version posted September 12, 2024. The copyright holder for this preprint (which was not certified by peer review) is the author/funder, who has granted medRxiv a license to display the preprint in perpetuity. It is made available under a [CC-BY 4.0 International license](https://creativecommons.org/licenses/by/4.0/).

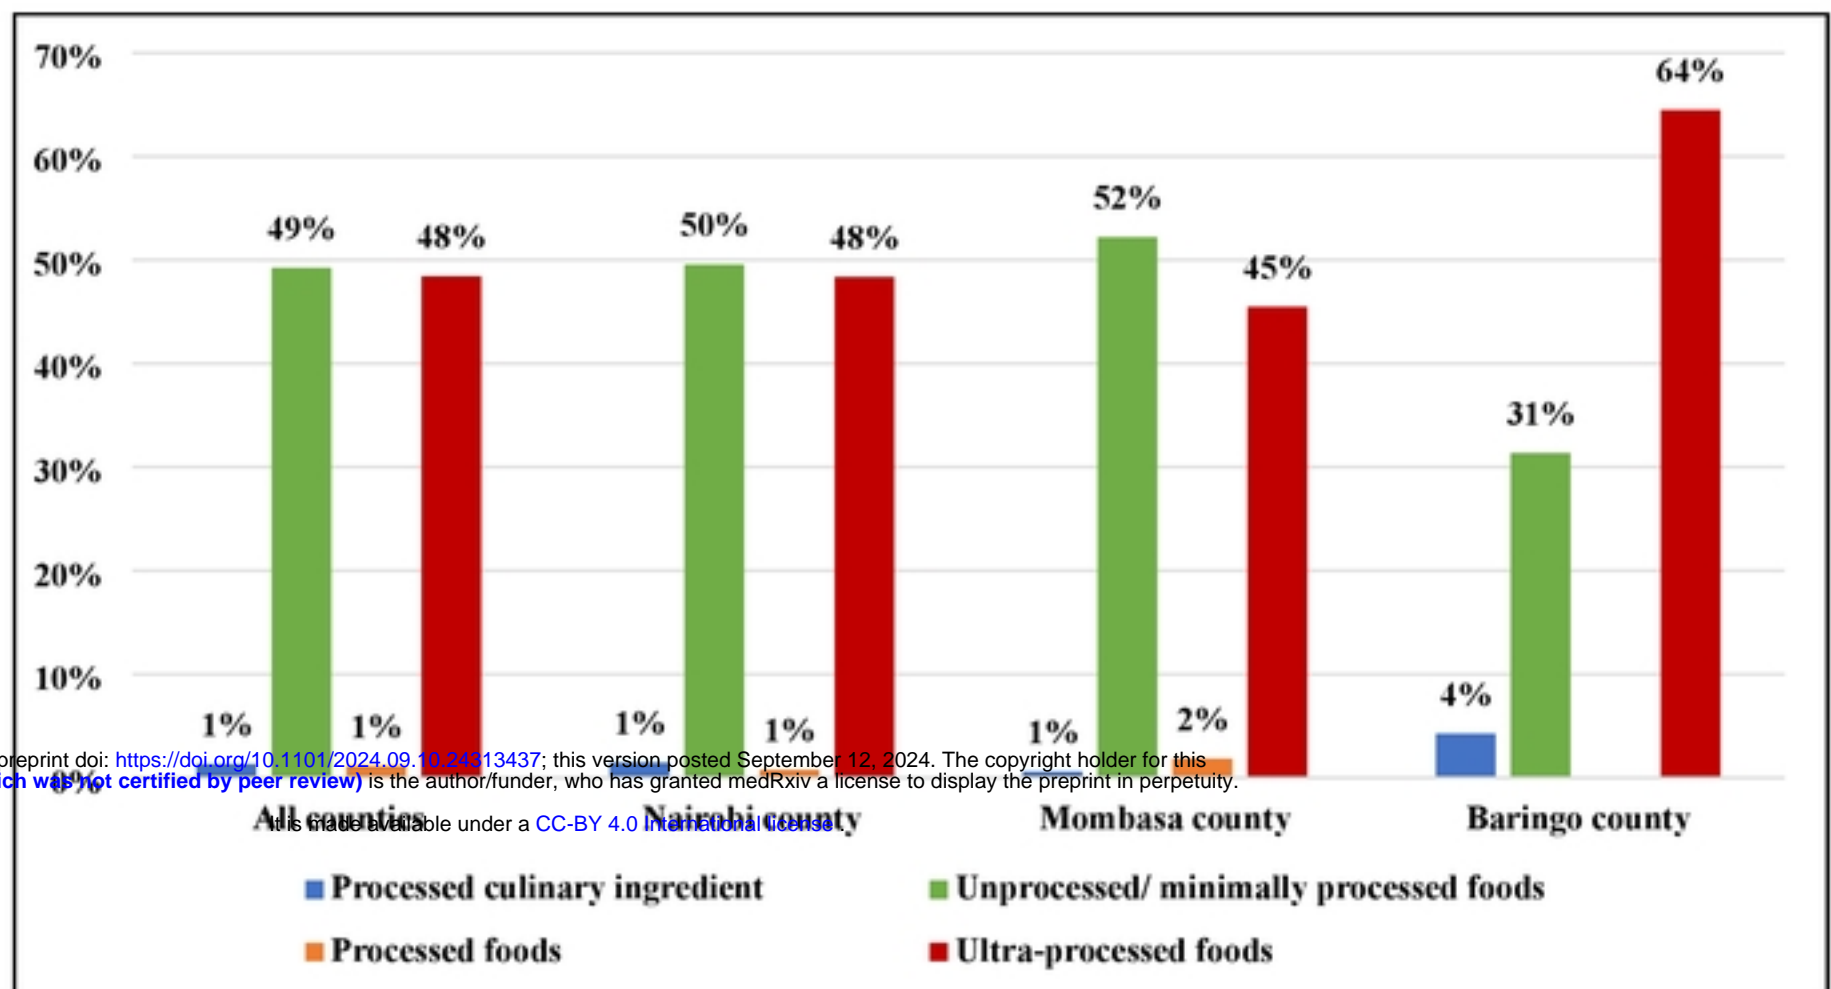

**Figure 2: The proportion (%) of advertised foods and beverages by NOVA food categories and counties.**
